# Supplementary material for: One-pot synthesis of Na+-free Cu-SSZ-13 and its application in the NH3–SCR reaction
Source: Royal Society of Chemistry journal article supplement (doi:10.1039/d1cc00966d), 2021-01-01
Supplement: d1cc00966d1.pdf [file d1cc00966d1.pdf]

## Supporting Information

### One-pot synthesis of Na<sup>+</sup>-free Cu-SSZ-13 and its application in the NH<sub>3</sub>-SCR reaction

Juan Wang,<sup>ab</sup> Linying Wang,<sup>b</sup> Dali Zhu,<sup>bc</sup> Wenhao Cui,<sup>bc</sup> Peng Tian,<sup>\*b</sup> Zhongmin Liu<sup>\*acb</sup>

<sup>a</sup>Zhang Dayu School of Chemistry, Dalian University of Technology, Dalian 116024, China

<sup>b</sup>National Engineering Laboratory for Methanol to Olefins, Dalian Institute of Chemical Physics, Chinese Academy of Sciences, Dalian 116023, China. E-mail: [tianpeng@dicp.ac.cn](mailto:tianpeng@dicp.ac.cn); [liuzm@dicp.ac.cn](mailto:liuzm@dicp.ac.cn).

<sup>c</sup>University of Chinese Academy of Sciences, Beijing 100049, China

### Experimental Section

#### Materials

The chemical reagents used for zeolite synthesis: *N,N,N*-trimethyl-1-adamant ammonium hydroxide (TMAdaOH, 25wt%), tetramethylammonium hydroxide (TMAOH, 25wt%); diethylamine (DEA, 99%), ethylenediamine (EDA, 99%), butylamine (BA, 99.5%), piprazine hexahydrate (PIP, 98%), tetraethylenepentamine (TEPA, 90%), pseudoboehmite (Al<sub>2</sub>O<sub>3</sub>, 66.5wt%), silica gel (99 wt%), CuSO<sub>4</sub>·5H<sub>2</sub>O (99%), aqueous NH<sub>3</sub> (25wt%).

#### Synthesis of Na<sup>+</sup>-free SSZ-13 in the presence of TMAdaOH and TMAOH (named SSZ-13<sub>TMAOH</sub>)

The molar composition of the synthesis gel was 30 SiO<sub>2</sub>:1 Al<sub>2</sub>O<sub>3</sub>:3 TMAOH:600 H<sub>2</sub>O:1.5 TMAdaOH. The synthesis procedure was as follows. Pseudoboehmite was added to an aqueous solution containing TMAdaOH, TMAOH and deionized water under stirring. After a clear solution is obtained (about 10 minutes), silica gel and seeds (commercial SSZ-13 in protonated form, Figure S1) were further added and stirred for 12 hours. The final gel was transferred to a Teflon-lined stainless steel autoclave and crystallized at 175 °C for a desired time. The product was collected by filtration, washed three times with deionized water, and dried at 100 °C for 24 hours. The as-synthesized sample was calcined in air at 600 °C for 5 h to obtain the H-SSZ-13.

#### Synthesis of Na<sup>+</sup>-free SSZ-13 in the presence of TMAdaOH and DEA (named SSZ-13<sub>DEA</sub>)

The synthesis procedure was the same as above, except DEA in place of TMAOH. Moreover, calcined Na<sup>+</sup>-free SSZ-13<sub>TMAOH</sub> was used as the seeds. The final gel composition was 30 SiO<sub>2</sub>:1 Al<sub>2</sub>O<sub>3</sub>:4 DEA:600 H<sub>2</sub>O:1.5 TMAdaOH

#### Synthesis of Na<sup>+</sup>-free SSZ-13 in the presence of TMAdaOH and EDA (named SSZ-13<sub>EDA</sub>)

The synthesis procedure was the same as that of SSZ-13<sub>DEA</sub>, except EDA in place of DEA. The final gel composition was 30 SiO<sub>2</sub>:1 Al<sub>2</sub>O<sub>3</sub>:4 EDA:600 H<sub>2</sub>O:1.5 TMAdaOH.

#### Synthesis of Na<sup>+</sup>-free SSZ-13 in the presence of TMAdaOH and BA (named SSZ-13<sub>BA</sub>)

The synthesis procedure was the same as that of SSZ-13<sub>DEA</sub>, except BA in place of DEA. The final gel

composition was 30 SiO<sub>2</sub>:1 Al<sub>2</sub>O<sub>3</sub>:4 BA: 600 H<sub>2</sub>O:1.5 TMAdaOH.

#### **Synthesis of Na<sup>+</sup>-free SSZ-13 in the presence of TMAdaOH and PIP (named SSZ-13<sub>PIP</sub>)**

The synthesis procedure was the same as that of SSZ-13<sub>DEA</sub>, except PIP in place of DEA. The final gel composition was 30 SiO<sub>2</sub>:1 Al<sub>2</sub>O<sub>3</sub>:5 PIP: 600 H<sub>2</sub>O:1.5 TMAdaOH.

#### **Synthesis of Na<sup>+</sup>-free SSZ-13 in the presence of TMAdaOH and NH<sub>3</sub> (aq) (named SSZ-13<sub>NH<sub>3</sub></sub>)**

The synthesis procedure was the same as that of SSZ-13<sub>DEA</sub>, except NH<sub>3</sub> (aq) in place of DEA. The final gel composition was 30 SiO<sub>2</sub>:1 Al<sub>2</sub>O<sub>3</sub>:5 NH<sub>3</sub>: 600 H<sub>2</sub>O:1.5 TMAdaOH.

#### **Synthesis of Na<sup>+</sup>-free CuSSZ-13 zeolites**

Pseudoboehmite was added to an aqueous solution containing TMAdaOH, TMAOH and deionized water under stirring. After a clear solution was obtained (about 10 minutes), silica gel and seeds (commercial SSZ-13 in calcined form) were added and stirred for 2 hours. Subsequently, aqueous solution of Cu-TEPA complex, which was prepared by mixing a 20 wt% aqueous solution of CuSO<sub>4</sub>·5H<sub>2</sub>O with the required amount of TEPA, was added into the gel. After being stirred for 12 hours, the final gel was transferred to a Teflon-lined stainless steel autoclave and crystallized at 175 °C for a desired time. The product was collected by filtration, washed three times with deionized water, and dried at 100 °C for 24 hours. The as-synthesized sample was calcined in air at 600 °C for 5 h to remove the organics.

#### **Characterization**

The powder X-ray diffraction (PXRD) data used for the phase identification were collected on a PANalytical X'Pert PRO X-ray diffract meter using the Cu K $\alpha$  radiation ( $\lambda = 1.54059 \text{ \AA}$ ), operating at 40 kV and 40 mA. The inorganic elemental compositions of the solid samples were measured with Philips Magix-601 X-ray fluorescence (XRF) spectrometer. The crystal morphology was observed using a scanning electron microscope (Hitachi SU8020). The textural properties of the calcined samples were measured by N<sub>2</sub> sorption at -196 °C on a Micromeritics ASAP2020 volumetric adsorption analyzer. Prior to the measurement, the sample was degassed at 350 °C under vacuum for 4 h. The total surface area was evaluated based on the BET equation. The micropore surface area and micropore volume were calculated using the t-plot method.

Thermal gravimetric analyses (TG-DSC) were carried out on NETZSCH ATS 449 F3 analyzer from room temperature to 1000 °C with a heating rate of 10 °C min<sup>-1</sup> in an air flow of 20 mL min<sup>-1</sup>.

All the solid state NMR experiments were performed using a Varian Infinity-plus 400 spectrometer equipped with a 9.4 T wide-bore magnet. Chemical shifts of <sup>29</sup>Si and <sup>27</sup>Al were referenced to kaolinite at -91.5 ppm and (NH<sub>4</sub>)Al(SO<sub>4</sub>)<sub>2</sub>·2H<sub>2</sub>O at -0.4 ppm respectively. The spinning rate is 10 kHz. The liquid <sup>13</sup>C NMR analysis was performed on Bruker Avance III 400 using D<sub>2</sub>O as deuterated reagent. Before NMR analysis, the as-synthesized sample was dissolved by 40 wt% HF acid (solid/liquid  $\approx$  0.1g/1mL), and the liquids were analyzed as they were.

NH<sub>3</sub>-TPD experiments were carried out in Micromeritics Autochem II 2920 device. In the tests, 100 mg of calcined sample particles (40-60 mesh) were loaded into a U-shaped quartz tube and pretreated in He flow (30 mL/min) at 650 °C for 1 h to remove any impurities. Then, the mixture of 2% NH<sub>3</sub> and 98 % He was treated with a flow rate of 30 mL/min at 120 °C, and the adsorbed NH<sub>3</sub> (60 min) was used. Subsequently, He

(30 mL/min) was purified by a filter for 30 min to remove weakly adsorbed NH<sub>3</sub> molecules. NH<sub>3</sub> desorption measurement was conducted at 100-600 °C (10°C /min) under He flow (30 mL/min).

EPR measurements were performed on a Bruker A200 spectrometer. The samples were sealed in a nuclear magnetic tube and then purged with dry N<sub>2</sub> at ambient temperature for 1 h. During the spectral collection, the microwave power was 2 mW, and the frequency was 9.2 GHz. The sweep width was 2000 G, and the sweep time was 84 s, modulated at 100 kHz with a 2 G amplitude. A time constant of 41 ms was used. The spectra were collected at 102 K. For the quantification of isolated Cu<sup>2+</sup> species, copper sulfate solution was used as a standard (at 102 K).

Temperature-programmed reduction by hydrogen (H<sub>2</sub>-TPR) was performed on an AUTOCHEM II instrument from Micromeritics. In the TPR experiments, 150 mg calcined sample particles (40-60 mesh) were pretreated in Ar flow (30 mL/ min) at 80 °C for 1h to remove impurities. The H<sub>2</sub>-TPR experiments were carried out at a 10% H<sub>2</sub> and 90% Ar flow (30 mL/min) from 80 °C to 900 °C at a heating rate of 10 °C/min, and the consumption of H<sub>2</sub> was determined by thermal conductivity detector (TCD).

### **Catalytic experiments**

NH<sub>3</sub>-SCR reaction was carried out in a fixed-bed quartz reactor. For each test, 0.30 g of Cu-SSZ-13 and 0.24 g of quartz beads (60-80 mesh) were blended and put into the reactor. The catalyst was activated in N<sub>2</sub> at 550 °C for 2 h prior to activity test. The feed gas contained NO (500 ppm), NH<sub>3</sub> (500 ppm), H<sub>2</sub>O (6.4%), O<sub>2</sub> (6.4%) and N<sub>2</sub>. The gas hourly space velocity (GHSV) was controlled as 100,000 h<sup>-1</sup>. The gas compositions (NO, NO<sub>2</sub> and N<sub>2</sub>O) were continually monitored by an FTIR spectrometer (Bruker). The FTIR spectra were collected after the reaction reaching a steady state (about 40 min). The formula shown below was used to determine the NO<sub>x</sub> conversion:

$$\text{NO conversion (\%)} = \frac{([NO]_{in} - [NO]_{out} - [NO_2]_{out} - 2[N_2O]_{out})}{[NO]_{in}} \times 100\%$$

### **High-temperature hydrothermal aging (HTA) treatment**

HTA was performed at 750 °C for 16 h in the presence of 12.5% H<sub>2</sub>O in air. The GHSV was controlled as 90,000 h<sup>-1</sup>.

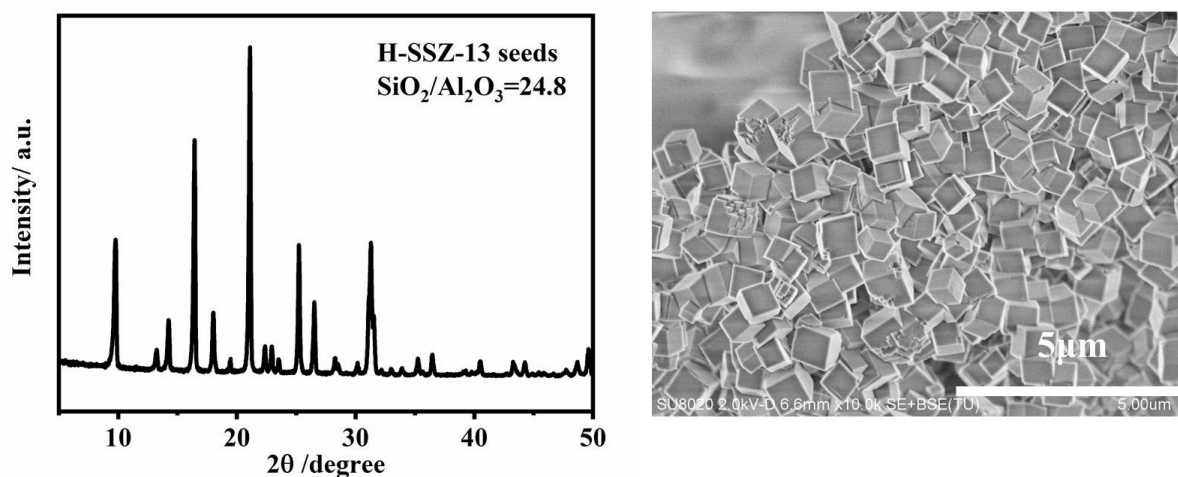

Figure S1 The XRD pattern and SEM image of the H-SSZ-13 seeds (commercial sample)

Table S1 Starting gel compositions, crystallization time and product  $\text{SiO}_2/\text{Al}_2\text{O}_3$  ratios of  $\text{Na}^+$ -free SSZ-13

| Sample <sup>a</sup>     | m SR                       | Time (h) | $\text{SiO}_2/\text{Al}_2\text{O}_3$ |
|-------------------------|----------------------------|----------|--------------------------------------|
| SSZ-13 <sub>TMAOH</sub> | m=3 SR: TMAOH              | 9        | 24.8                                 |
| SSZ-13 <sub>EDA</sub>   | m=4 SR: EDA                | 108      | 27.3                                 |
| SSZ-13 <sub>BA</sub>    | m=4 SR: BA                 | 72       | 24.8                                 |
| SSZ-13 <sub>DEA</sub>   | m=4 SR: DEA                | 108      | 24.0                                 |
| SSZ-13 <sub>PIP</sub>   | m=5 SR: PIP                | 108      | 25.1                                 |
| SSZ-13 <sub>NH3</sub>   | m=5 SR: $\text{NH}_3$ (aq) | 72       | 26                                   |

<sup>a</sup>All samples were synthesized with the initial gel of 30  $\text{SiO}_2$ :1  $\text{Al}_2\text{O}_3$ :m SR:600  $\text{H}_2\text{O}$ :1.5 TMAOH (10 wt% seeds addition) at 175 °C.

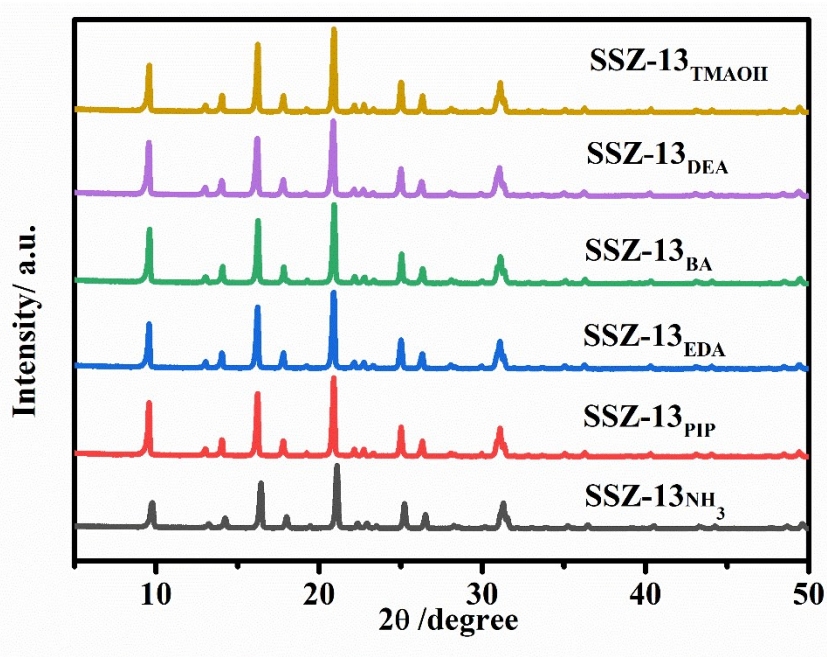

Figure S2 XRD patterns of the as-synthesized  $\text{Na}^+$ -free SSZ-13.

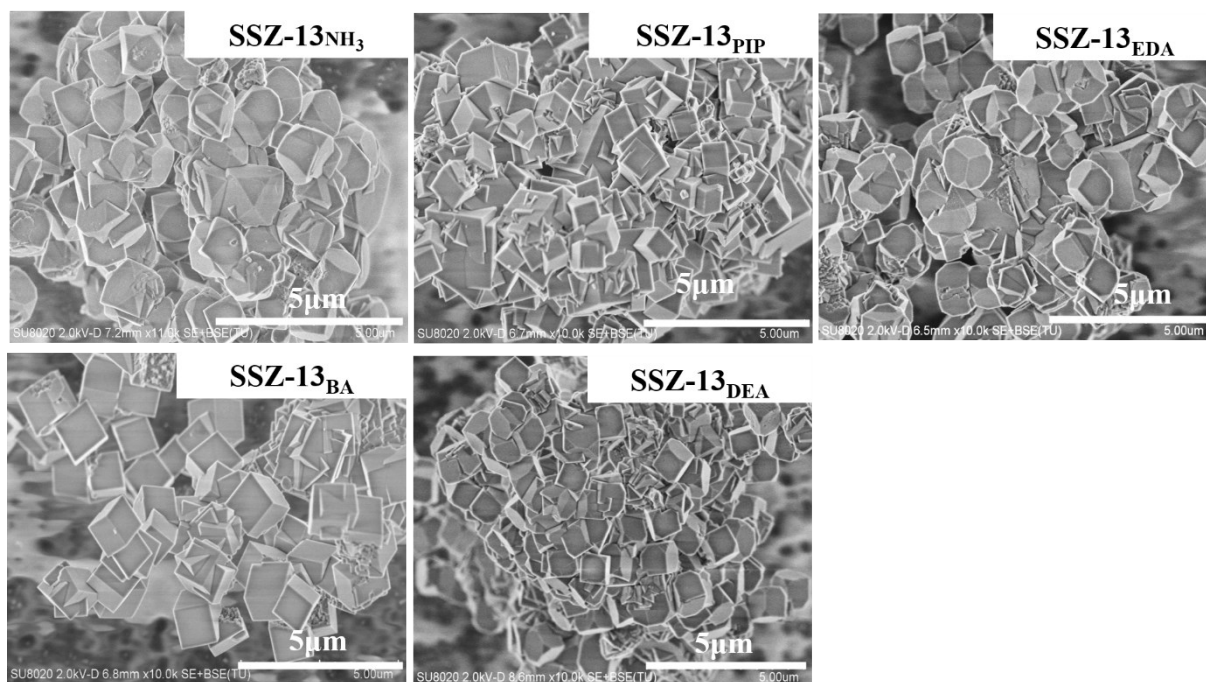

**Figure S3** SEM images of the as-synthesized Na<sup>+</sup>-free SSZ-13 zeolites.

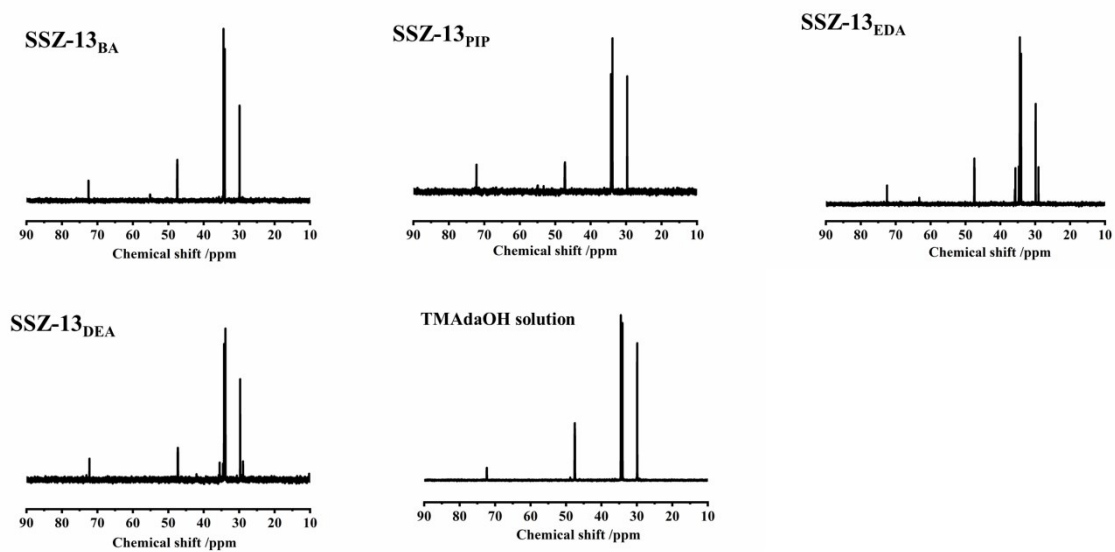

**Figure S4** Liquid <sup>13</sup>C NMR spectra of the as-synthesized samples dissolved in HF solution.

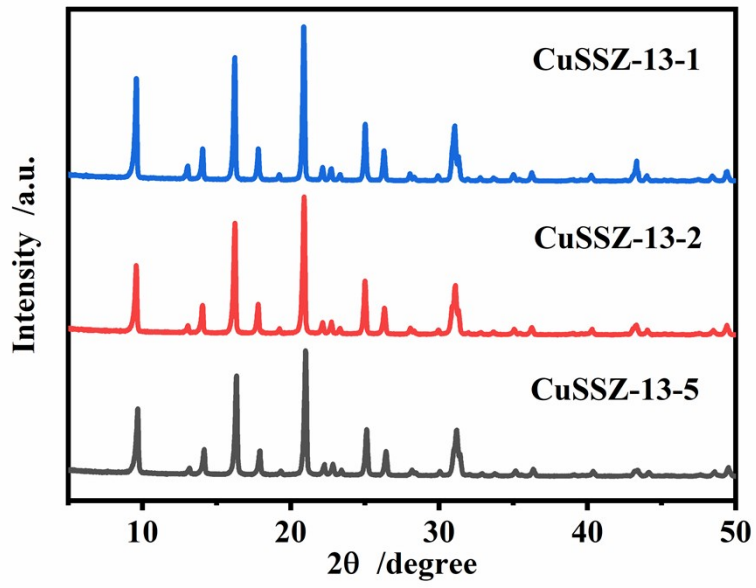

Figure S5 XRD patterns of the as-synthesized Na<sup>+</sup>-free CuSSZ-13.

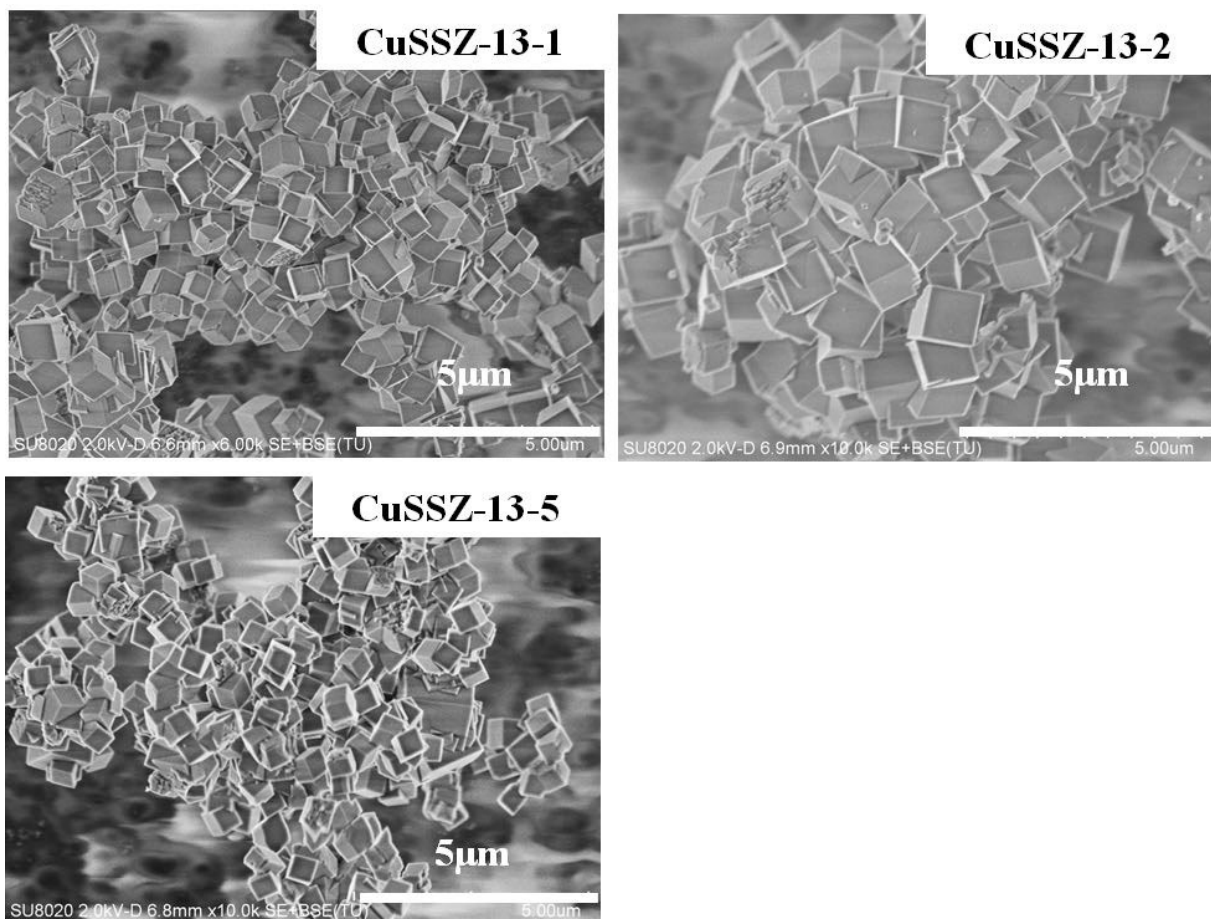

Figure S6 SEM images of the as-synthesized Na<sup>+</sup>-free CuSSZ-13.

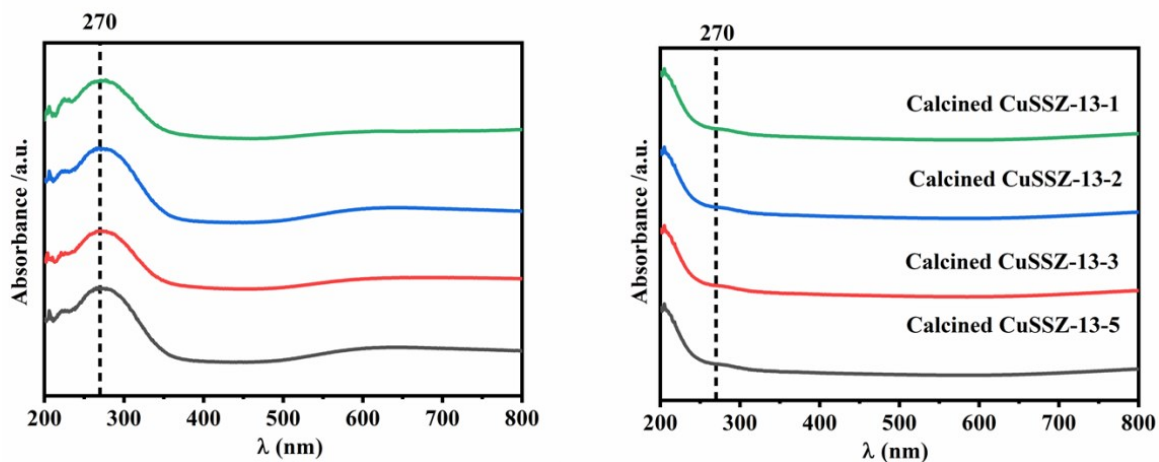

**Figure S7** UV/Vis spectra of Na<sup>+</sup>-free CuSSZ-13 before (left) and after calcination (right).

**Table S2.** Textural properties of Na<sup>+</sup>-free CuSSZ-13-4

| Sample            | Pore volume <sup>a</sup> (cm <sup>3</sup> g <sup>-1</sup> ) <sup>a</sup> |                    |                   | Surface area <sup>b</sup> (m <sup>2</sup> g <sup>-1</sup> ) <sup>b</sup> |                    |                  |
|-------------------|--------------------------------------------------------------------------|--------------------|-------------------|--------------------------------------------------------------------------|--------------------|------------------|
|                   | V <sub>total</sub>                                                       | V <sub>micro</sub> | V <sub>meso</sub> | S <sub>total</sub>                                                       | S <sub>micro</sub> | S <sub>ext</sub> |
| <b>CuSSZ-13-4</b> | 0.29                                                                     | 0.27               | 0.02              | 603                                                                      | 583                | 20               |

a. V<sub>total</sub> is evaluated at P/P<sub>0</sub>=0.97; V<sub>micro</sub> = t-plot micropore volume; V<sub>meso</sub> = V<sub>total</sub> - V<sub>micro</sub>.

b. S<sub>total</sub>: BET surface area; S<sub>micro</sub>: t-plot micropore surface area; S<sub>ext</sub> = S<sub>total</sub> - S<sub>micro</sub>.

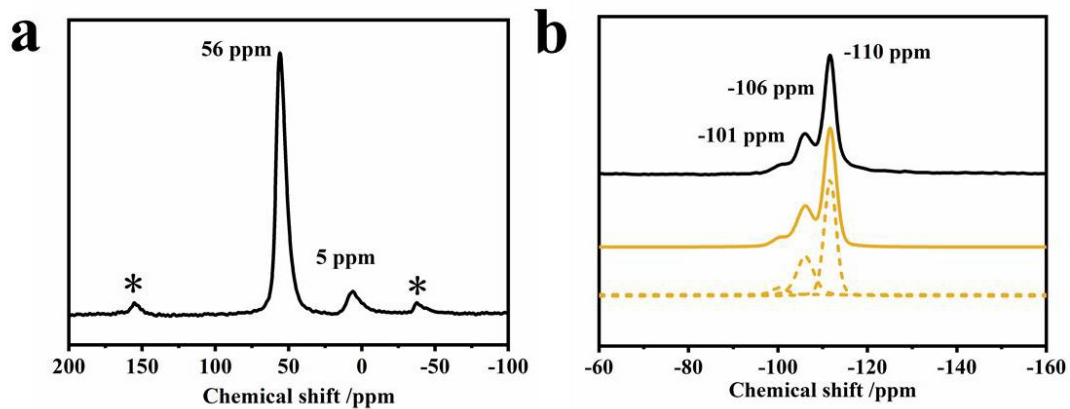

**Figure S8** (a)  $^{27}\text{Al}$  and (b)  $^{29}\text{Si}$  MAS NMR spectra of the as-synthesized CuSSZ-13-4. \* denotes spinning side band.

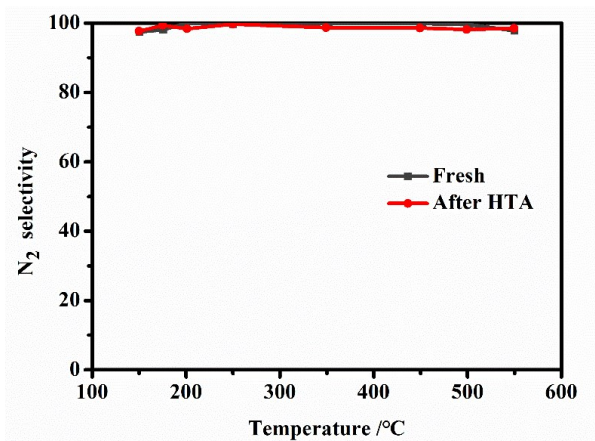

**Figure S9** The  $\text{N}_2$  selectivity over the CuSSZ-13-4 before and after hydrothermal aging treatment. The  $\text{N}_2$  selectivity was calculated according to the formula below:

$$N_2 \text{ Selectivity} = \left( 1 - \frac{2[N_2O]}{[NO_x]_{in} - [NO_x]_{out} + [NH_3]_{in} - [NH_3]_{out}} \right) \times 100\%$$

Since  $\text{NH}_3$  has not been monitored in real-time, the amount of  $\text{NH}_3$  is considered equal to  $\text{NO}$ .

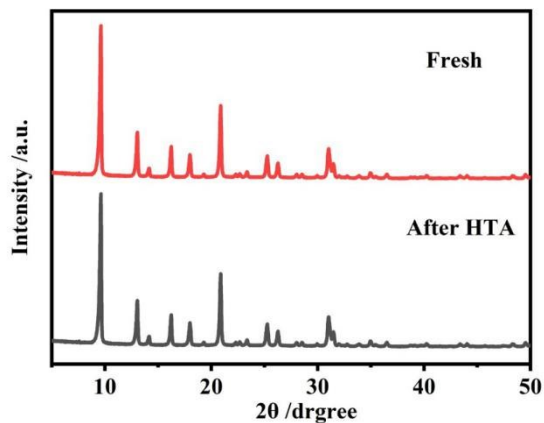

**Figure S10** XRD patterns of calcined CuSSZ-13-4 before and after hydrothermal aging treatment.



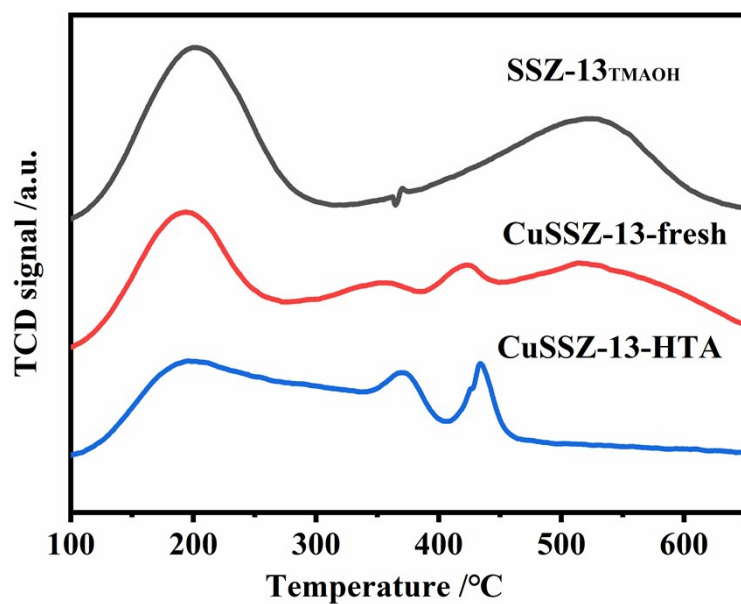

**Figure S11**  $\text{NH}_3$ -TPD curves of calcined  $\text{SSZ-13}_{\text{TMAOH}}$  and  $\text{CuSSZ-13-4}$  before and after hydrothermal aging treatment.

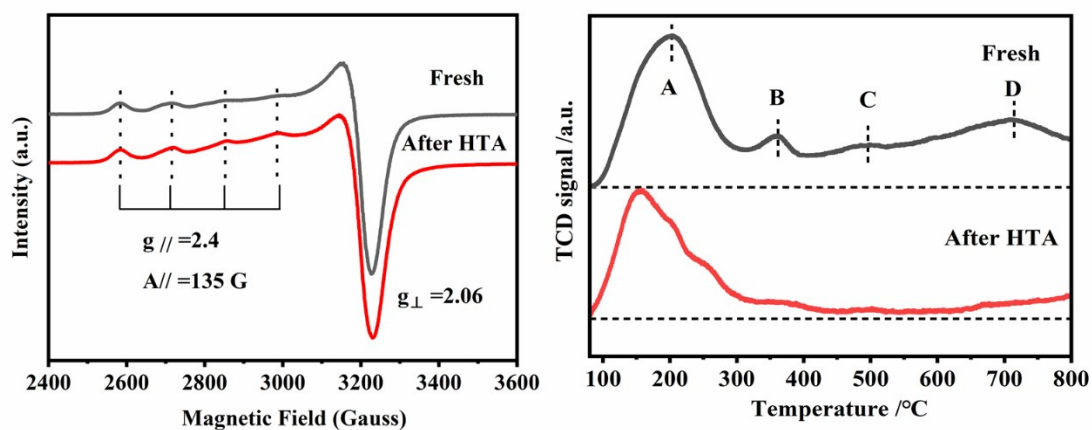

**Figure S12** EPR spectra (left) and  $\text{H}_2$ -TPR profiles (right) of the calcined  $\text{CuSSZ-13-4}$  before and after hydrothermal aging treatment.

**Table S3.** Isolated  $\text{Cu}^{2+}$  content of the samples by EPR analyses

| Sample              | Fresh (wt%) | After hydrothermal aging (wt%) |
|---------------------|-------------|--------------------------------|
| $\text{CuSSZ-13-4}$ | 2.11        | 2.11                           |
